# Supplementary material for: Multi-Functional Nano-Doped Hollow Fiber from Microfluidics for Sensors and Micromotors
Source: MDPI journal article supplement (doi:10.3390/bios14040186), 2024-04-10
Supplement: s1 [file s1]

# Multi-functional Nano-doped Hollow Fiber from Microfluidics for Sensors and Micromotors

Yanpeng Wang<sup>1</sup>, Zhaoyang Wang<sup>1</sup>, Haotian Sun<sup>1</sup>, Tong Lyu<sup>1</sup>, Xing Ma<sup>2</sup>, Jinhong Guo<sup>3\*</sup>, Ye

Tian<sup>1,4\*</sup>

<sup>1</sup> College of Medicine and Biological Information Engineering, Northeastern University, 110169 Shenyang, China.

<sup>2</sup> School of Materials Science and Engineering, Harbin Institute of Technology (Shenzhen), Guangdong, Shenzhen, 518055, China.

<sup>3</sup> School of Sensing Science and Engineering, Shanghai Jiao Tong University, Shanghai 200240, China.

<sup>4</sup> Foshan Graduate School of Innovation, Northeastern University, 528300, Foshan, China.

\*Corresponding author: [guojinhong@sjtu.edu.cn](mailto:guojinhong@sjtu.edu.cn), [tianye@bmie.neu.edu.cn](mailto:tianye@bmie.neu.edu.cn)

Supplementary data

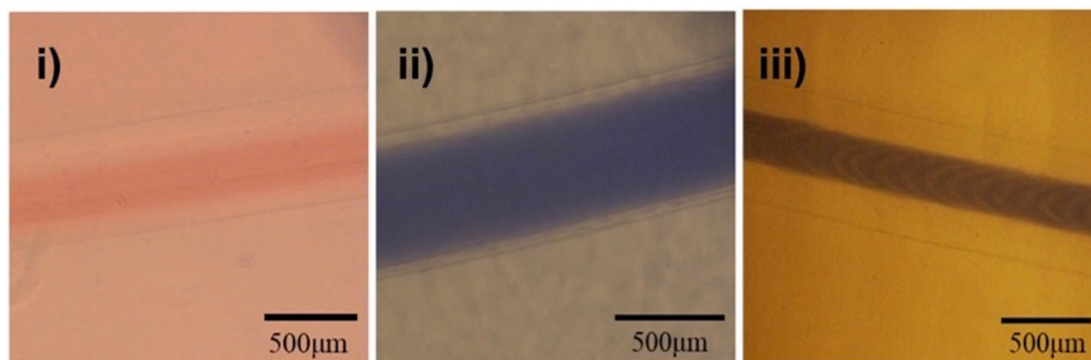

**Fig S1. Fabrication and morphology of hollow fibers.** Different systems for the fabrication of hollow fiber. The inner phase solutions are MC (i), HPMC ii) and PEG (iii), respectively.

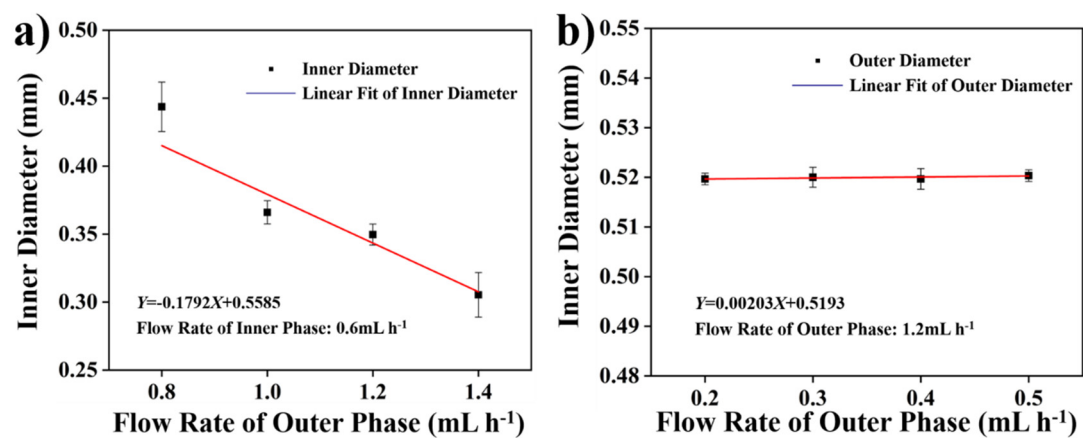

**Fig S2. Flow velocity versus hollow fiber diameter.** a) Relationship between the outer phase flow rate and the inner diameter of the hollow fiber. b) Relationship between the inner phase flow rate and the outer diameter of the hollow fiber.

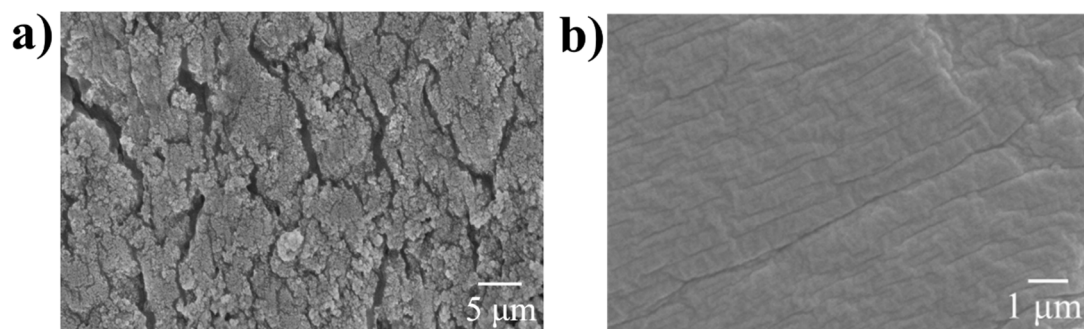

**Fig S3. Localized enlarged image of HF-CNT surface morphology taken by scanning electron microscope.** (a) SEM image of localized surface of HF-CNT magnified 4800 times. (b) SEM image of localized surface of HF-CNT magnified 24000 times.

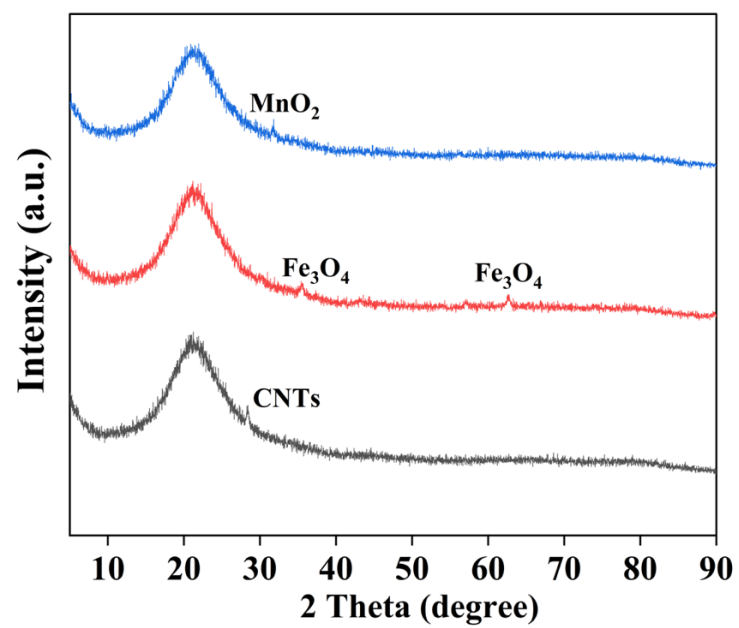

Fig S4 XRD images of hollow fibers.

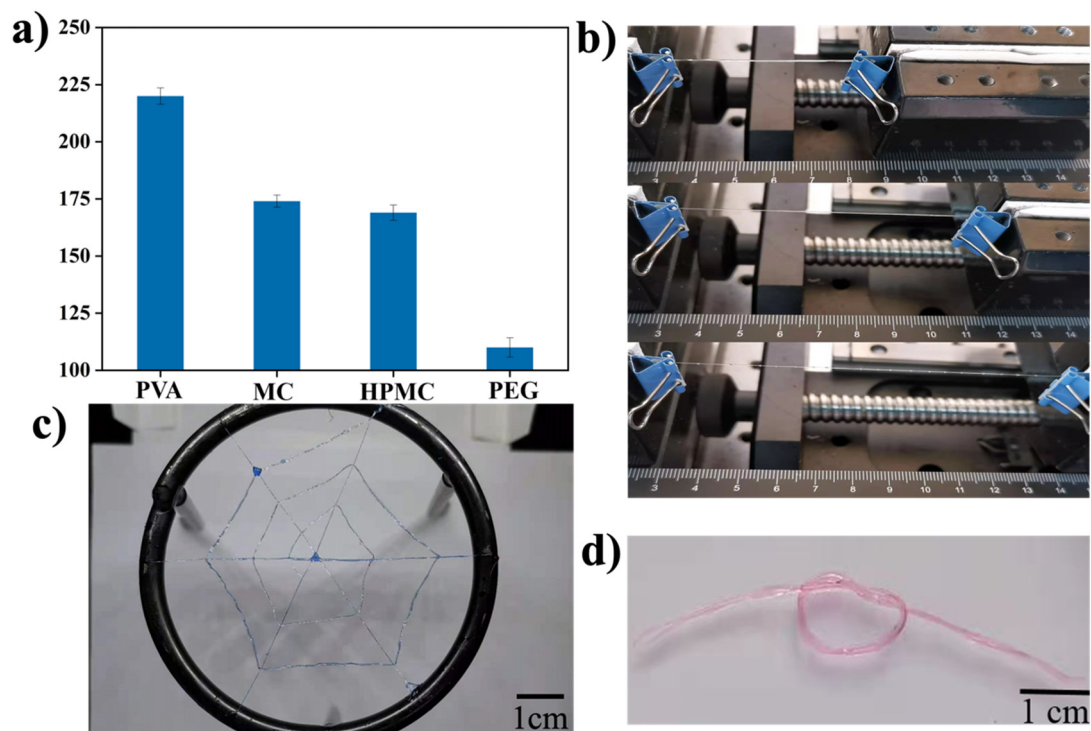

**Fig. S5 Mechanical properties of hollow fiber.** a) Tensile properties of hollow fibers prepared with different internal phase solutions. b) Tensile test of hollow fiber. c) Bending properties of hollow fiber. d) Torsion properties of hollow fiber.

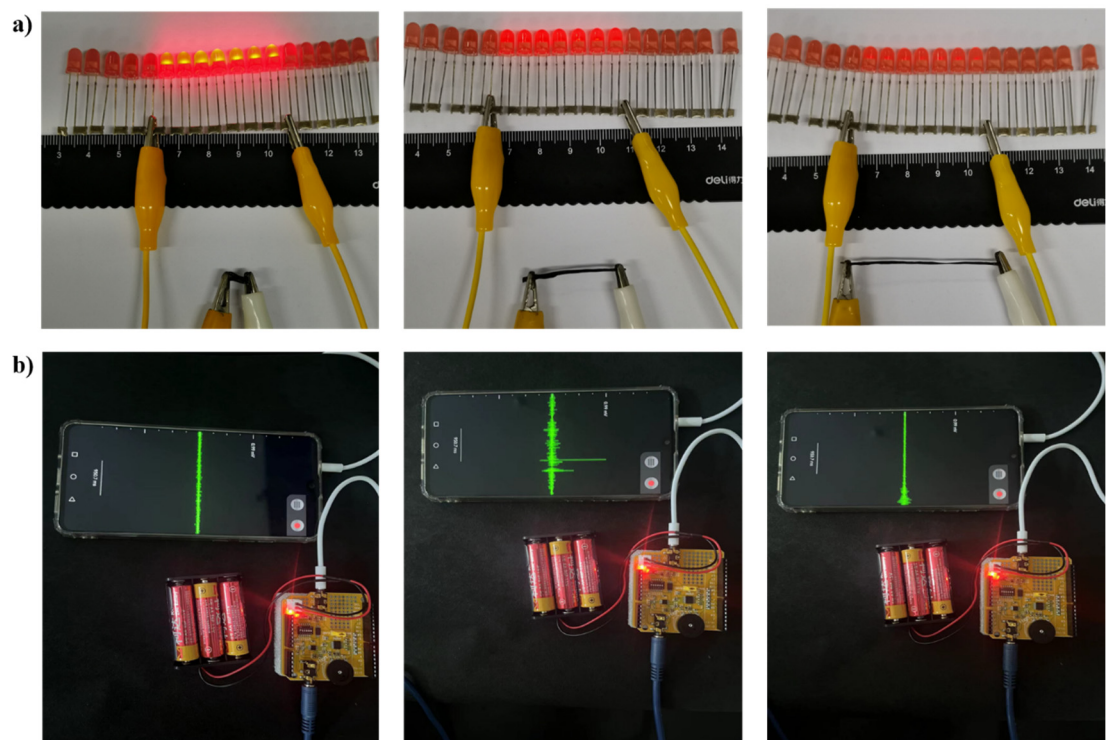

**Fig. S6 Electrical properties of hollow fibers.** a) The ability of hollow fiber to light up LED lamps under different degrees of stretching. b) Hollow fiber for monitoring of EMG signals.

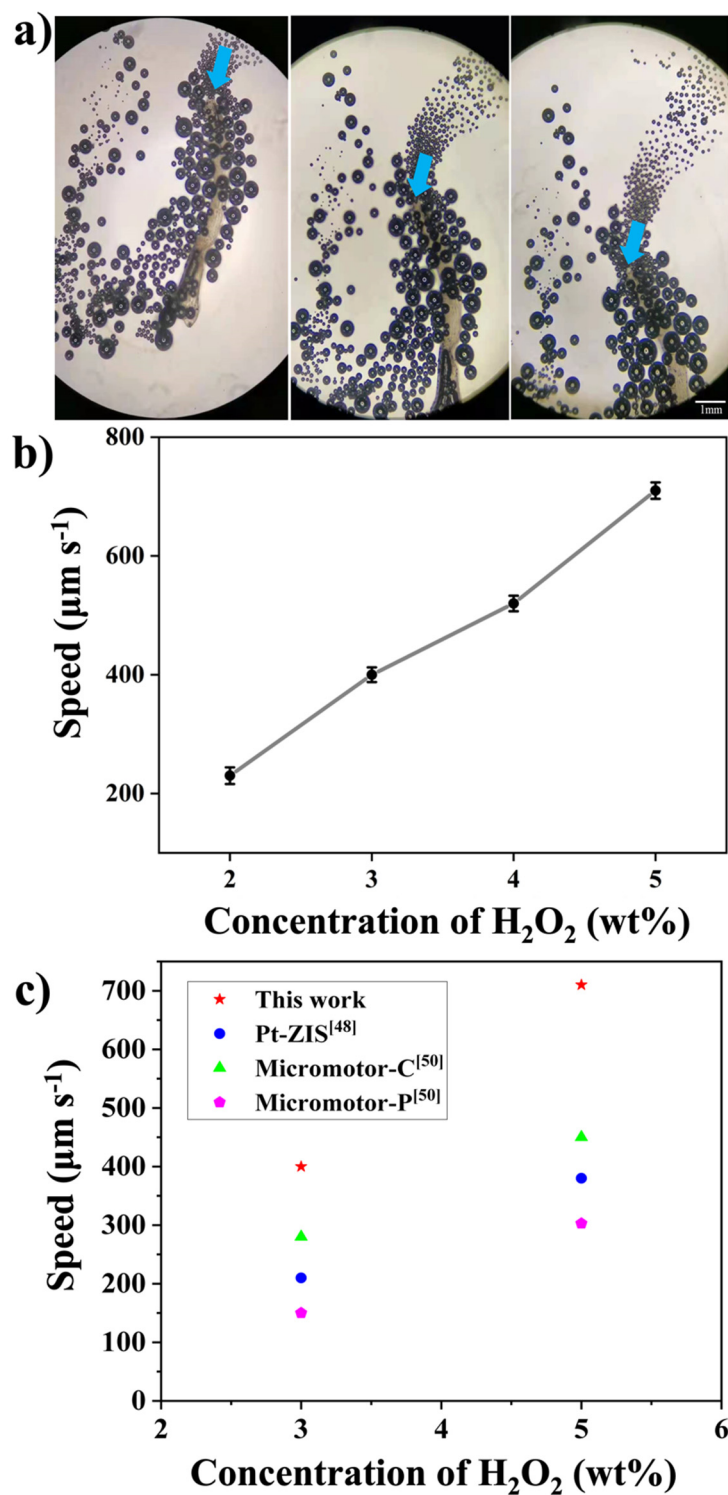

**Fig S7 Bubble-propelled micromotors.** a) Movement of hollow fiber micromotor with MnO<sub>2</sub>. b) Movement velocity of bubble-driven hollow fiber micromotor in H<sub>2</sub>O<sub>2</sub> solution with different concentration. c) Comparison of movement velocity of hydrogel fiber micromotors with different networks in different concentrations of H<sub>2</sub>O<sub>2</sub> solution. Data is presented as Mean±SD (n=3).



| Hydrogel network | Method                        | Conductivity (S m <sup>-1</sup> ) | Monitoring of motion signals | Monitoring of physiological signals | Ref      |
|------------------|-------------------------------|-----------------------------------|------------------------------|-------------------------------------|----------|
| AAM/NAGA         | Continuous dry-wet spinning   | 0.69                              | YES                          | -                                   | [45]     |
| AAM/APhe         | One-step coaxial wet-spinning | 10.59                             | YES                          | -                                   | [46]     |
| HF-CNTs          | microfluidic                  | 15.8                              | YES                          | YES                                 | The work |

**Table S1.** Comparison of electrical conductivity of hydrogel fibers of different networks with human detection function.

### **Supporting Videos**

S1 Preparation process of hollow fiber.

S2 Stretching process of hollow fiber.

S3 Manipulation of directional micromotor in T-shaped channel.

S4 Movement of hollow fibers with  $\text{MnO}_2$  on the inner wall in  $\text{H}_2\text{O}_2$ .

S5 Movement velocity of bubble-driven hollow fiber micromotor in  $\text{H}_2\text{O}_2$  solution with different concentration.
