# Supplementary material for: Multi-Functional Nano-Doped Hollow Fiber from Microfluidics for Sensors and Micromotors
Source: Biosensors (Basel). 2024 Apr 10;14(4):186. doi: 10.3390/bios14040186 (PMC11048216; doi:10.3390/bios14040186)
Supplement: Supplementary file 1 [file biosensors-14-00186-s001.zip]

Archive with 6 entries (6 files):
- S1.mp4
- S2.mp4
- S3.mp4
- S4.mp4
- S5.mp4
- SI.pdf
